# Supplementary material for: Deciphering the Binding of the Nuclear Localization Sequence of Myc Protein to the Nuclear Carrier Importin α3
Source: MDPI journal article supplement (doi:10.3390/ijms232315333), 2022-12-05

## **Supplementary Material**

Deciphering the binding of the nuclear localization sequence of Myc protein to  
the nuclear carrier Importin  $\alpha 3$

Bruno Rizzuti, Juan L. Iovanna and José L Neira

# SUPPORTING TABLE

Table S1: Chemical shifts ( $\delta$ , ppm from TSP) of NLS-Myc in aqueous solution (pH 7.0, 10 °C)<sup>a</sup>

|         | NH   | H <sub><math>\alpha</math></sub> | H <sub><math>\beta</math>2</sub> | H <sub><math>\beta</math>3</sub> | H <sub><math>\gamma</math>2</sub> | H <sub><math>\gamma</math>3</sub> | H <sub><math>\delta</math>2</sub> | H <sub><math>\delta</math>3</sub> | H <sub><math>\epsilon</math></sub> | H <sub><math>\zeta</math></sub> |
|---------|------|----------------------------------|----------------------------------|----------------------------------|-----------------------------------|-----------------------------------|-----------------------------------|-----------------------------------|------------------------------------|---------------------------------|
| Ala310  |      | 4.11 (-0.20)                     | 1.60 (Me)                        |                                  |                                   |                                   |                                   |                                   |                                    |                                 |
| Ala311  | 8.71 | 4.64 (-0.04)                     | 1.37 (Me)                        |                                  |                                   |                                   |                                   |                                   |                                    |                                 |
| Pro312  |      | 4.42 (-0.31)                     | 1.99                             |                                  | 2.37                              |                                   | 3.77; 3.54                        |                                   |                                    |                                 |
| Pro313  |      | 4.37 (-0.11)                     | 2.04                             |                                  | 2.37                              |                                   | 3.77; 3.54                        |                                   |                                    |                                 |
| Ser314  | 8.55 | 4.47 (-0.04)                     | 3.87                             |                                  |                                   |                                   |                                   |                                   |                                    |                                 |
| Thr315  | 8.40 | 4.37 (-0.01)                     | 4.21                             |                                  | 1.22 (Me)                         |                                   |                                   |                                   |                                    |                                 |
| Arg316  | 8.47 | 4.34 (-0.02)                     | 1.79                             |                                  | 1.59                              |                                   |                                   |                                   |                                    |                                 |
| Lys317* |      | 4.31 (0.08)                      | 1.75                             |                                  |                                   |                                   |                                   |                                   |                                    |                                 |
| Asp318  | 8.35 | 4.59 (0.05)                      | 2.59                             |                                  |                                   |                                   |                                   |                                   |                                    |                                 |
| Tyr319  | 8.17 | 4.79 (-0.09)                     | 3.05;2.86                        |                                  |                                   |                                   | 7.16 (7.12 (cis))                 |                                   | 6.83 (6.83 (cis))                  |                                 |
| Pro320  |      | 4.45 (0.08)                      | 2.05; 1.92                       |                                  | 2.37                              |                                   | 3.86; 3.67                        |                                   |                                    |                                 |
| Ala321  | 8.32 | 4.26 (0.07)                      | 1.36 (Me)                        |                                  |                                   |                                   |                                   |                                   |                                    |                                 |
| Ala322  | 8.35 | 4.33 (0.007)                     | 1.36 (Me)                        |                                  |                                   |                                   |                                   |                                   |                                    |                                 |
| Lys323* | 8.52 | 4.34 (0.06)                      | 1.70                             |                                  | 1.30                              |                                   |                                   |                                   |                                    |                                 |
| Arg324  | 8.38 | 4.34 (-0.02)                     | 1.82                             |                                  | 1.57                              |                                   |                                   |                                   |                                    |                                 |
| Val325* | 8.28 | 4.09 (0.03)                      | 2.03                             |                                  | 0.92 (Me)                         |                                   |                                   |                                   |                                    |                                 |

|         |      |              |                 |            |           |
|---------|------|--------------|-----------------|------------|-----------|
| Lys326  | 8.45 | 4.36 (0.03)  | 1.62            | 1.34       |           |
| Leu327  | 8.49 | 4.32 (-0.02) | 1.81            | 1.62       | 0.90 (Me) |
| Asp328  | 8.50 | 4.61 (-0.04) | 2.71            |            |           |
| Ser329  | 8.29 | 4.40 (-0.06) | 3.88            |            |           |
| Val330  | 8.17 | 4.09 (-0.01) | 2.10            | 0.93 (Me)  |           |
| Arg331  | 8.43 | 4.32 (-0.04) | 1.80            | 1.62       |           |
| Val332* | 8.28 | 4.09 (0.02)  | 2.03            | 0.92 (Me)  |           |
| Leu333  | 8.43 | 4.31 (-0.04) | 1.80            | 1.69       | 0.85 (Me) |
| Arg334  | 8.38 | 4.34 (0.03)  | 1.82            | 1.57       |           |
| Gln335  | 8.54 | 4.46 (0.09)  | 2.03            | 2.68; 2.41 |           |
| Ile336  | 8.32 | 4.18 (-0.02) | 1.87; 0.92 (Me) | 1.48; 1.22 | 0.92 (Me) |
| Ser337  | 8.48 | 4.51 (0.03)  | 3.87            |            |           |
| Asn338  | 8.14 | 4.48 (-0.24) | 2.79; 2.69      |            |           |
| Asn339  | 8.62 | 4.80 (0.12)  | 2.87, 2.75      |            |           |

<sup>a</sup> The (\*) indicates those residues whose resonances could not be unambiguously assigned. For the H<sub>α</sub> proton column, the values within parenthesis are the conformational shifts ( $\delta_{\text{res}} - \delta_{\text{rc}}$ ). The random-coil values for the sequence were obtained from: [https://spin.niddk.nih.gov/bax/nmrserver/Poulsen\\_rc\\_CS/](https://spin.niddk.nih.gov/bax/nmrserver/Poulsen_rc_CS/).

Figure S1. **1D  $^1\text{H}$ -NMR spectrum of NLS-Myc dissolved in  $\text{D}_2\text{O}$ .** The amide region (top) and the methyl region (bottom) of a 1D  $^1\text{H}$ -NMR spectrum after dissolving in  $\text{D}_2\text{O}$ . The signals appearing in the amide region at 6.81 and 7.16 ppm, respectively, correspond to the aromatic protons of Tyr319.

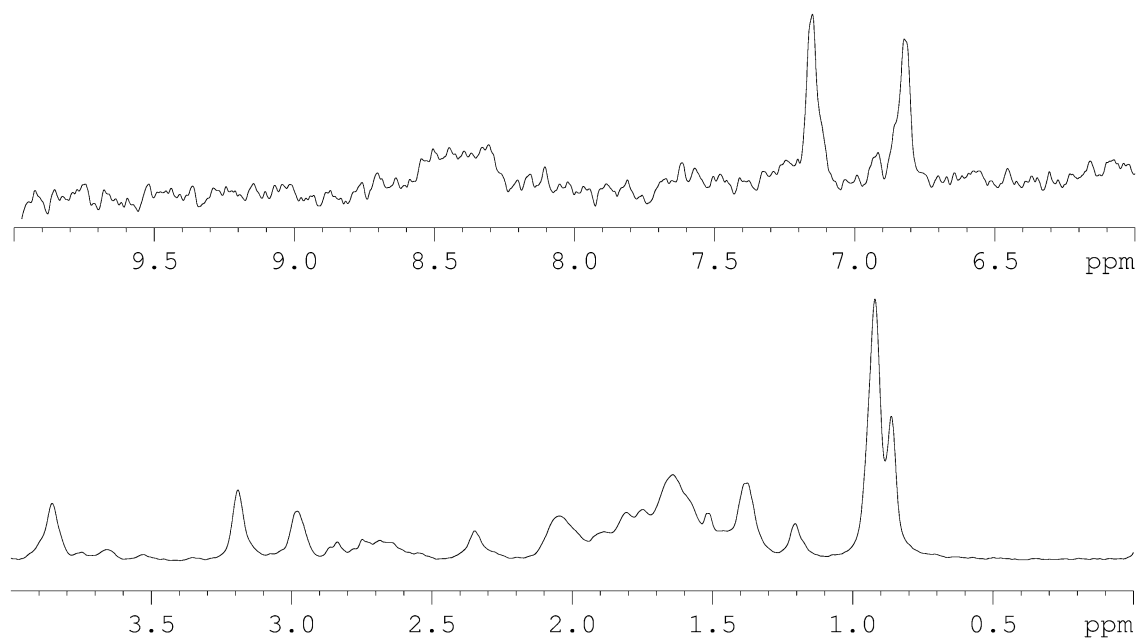

Figure S2. **Summary of NMR data for NLS-Myc peptide in aqueous solution.** NOEs are classified into strong, medium or weak according to the height of the bar underneath the sequence; signal intensity was judged by visual inspection from the NOESY experiments with 225 ms of mixing time. The corresponding  $H_\alpha$  NOEs with the following  $H_\delta$  of a proline residue are indicated by an open bar in the row corresponding to the  $\alpha N(i, i+1)$  contacts. The dotted lines indicate NOE contacts which could not be unambiguously assigned due to signal overlapping or ambiguous assignment of the protons.

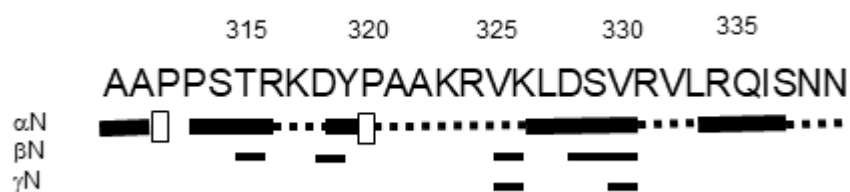

Figure S3. **DOSY NMR results.** Exponential fitting curve of the intensity of the methyl peak of the NLS-myc spectra as the square of the strength of the gradient was increased.

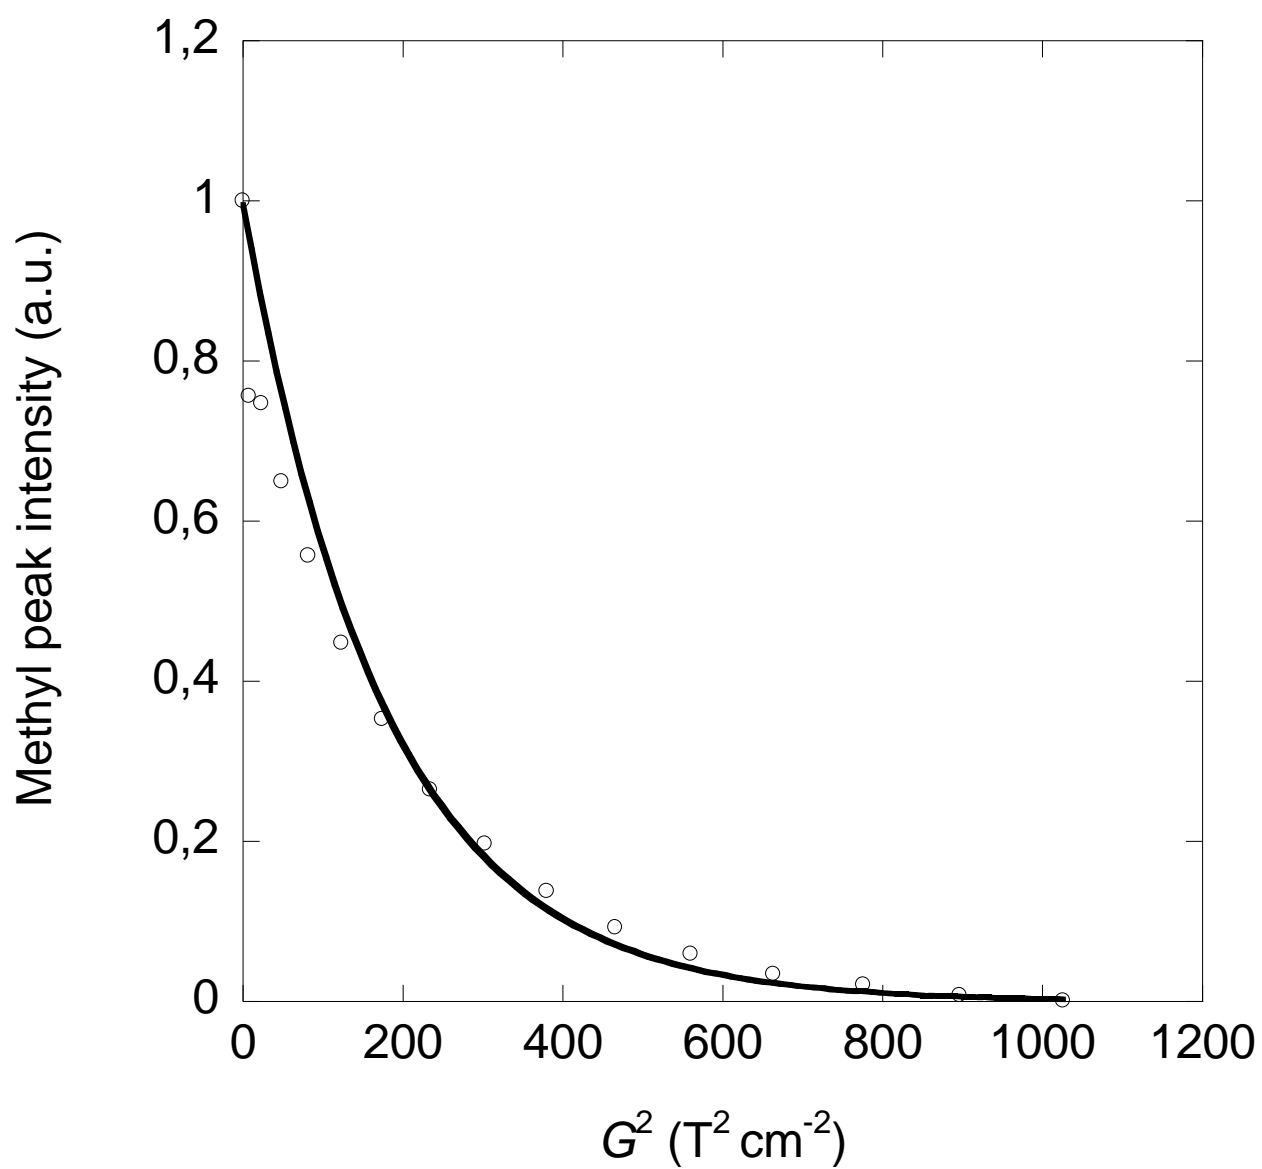

Supplement: s1 [file s1]
